# Supplementary material
Source: PubMed Central journal article supplement (PMC3769929)
Supplement: NIHMS505224-supplement-01.pdf [file NIHMS505224-supplement-01.pdf]

**Table S1. Data Collection and Refinement Statistics, Related to Figure 1**

|                                        | <b>hAgo1-endoRNA</b>  | <b>hAgo1-let-7</b>    |
|----------------------------------------|-----------------------|-----------------------|
| <b>Data Collection</b>                 |                       |                       |
| Space group                            | <i>P2<sub>1</sub></i> | <i>P2<sub>1</sub></i> |
| Cell dimensions                        |                       |                       |
| <i>a, b, c</i> (Å)                     | 70.47, 98.63, 73.21   | 70.39, 97.73, 72.7    |
| $\alpha, \beta, \gamma$ (°)            | 90.0, 110.96, 90.0    | 90.0, 110.89, 90.0    |
| Wavelength (Å)                         | 1.075                 | 1.075                 |
| Resolution (Å) <sup>a</sup>            | 50.0-1.75 (1.8-1.75)  | 50.0-2.1 (2.16-2.1)   |
| <i>R</i> merge (%)                     | 5.5 (42.2)            | 4.1 (32.0)            |
| <i>I</i> / $\sigma$ ( <i>I</i> )       | 12.63 (2.55)          | 16.9 (2.88)           |
| Completeness (%)                       | 98.08 (88.12)         | 94.41 (66.83)         |
| Redundancy                             | 3.1 (2.2)             | 3.0 (1.7)             |
| <b>Refinement</b>                      |                       |                       |
| Resolution (Å)                         | 32.9-1.75             | 40.56-2.1             |
| No. reflections                        | 91605                 | 50618                 |
| <i>R</i> work / <i>R</i> free (%)      | 17.2/20.2             | 17.4/21.7             |
| No. atoms (non-hydrogen)               | 7179                  | 7204                  |
| Protein                                | 6475                  | 6580                  |
| RNA                                    | 234                   | 257                   |
| Water                                  | 470                   | 367                   |
|                                        |                       |                       |
| < <i>B</i> -factors> (Å <sup>2</sup> ) |                       |                       |
| Protein                                | 30.0                  | 37.77                 |
| RNA                                    | 45.7                  | 41.1                  |
| Water                                  | 33.0                  | 35.19                 |
|                                        |                       |                       |
| r.m.s. deviations                      |                       |                       |
| Bond lengths (Å)                       | 0.007                 | 0.009                 |
| Bond angles (°)                        | 1.070                 | 1.164                 |
| <b>MolProbity Statistics</b>           |                       |                       |
| All atom clashscore                    | 1.2                   | 2.63                  |
| Poor rotamers (%)                      | 0.42                  | 0.28                  |
| Ramachandran Outliers (%)              | 0                     | 0.25                  |
| Ramachandran Favored (%)               | 98.48                 | 97.4                  |
| MolProbity score                       | 0.84                  | 1.17                  |
